# Supplementary material for: Single-cell transcriptomic analysis of tissue-resident memory T cells in human lung cancer
Source: PubMed Central journal article supplement — J Exp Med. 2019 Jun 21;216(9):2128–49. doi: 10.1084/jem.20190249 (PMC6719422; doi:10.1084/jem.20190249), 2019-06-21
Supplement: JEM_20190249_sm.pdf [file JEM_20190249_sm.pdf]

## Supplemental material

Clarke et al., <https://doi.org/10.1084/jem.20190249>

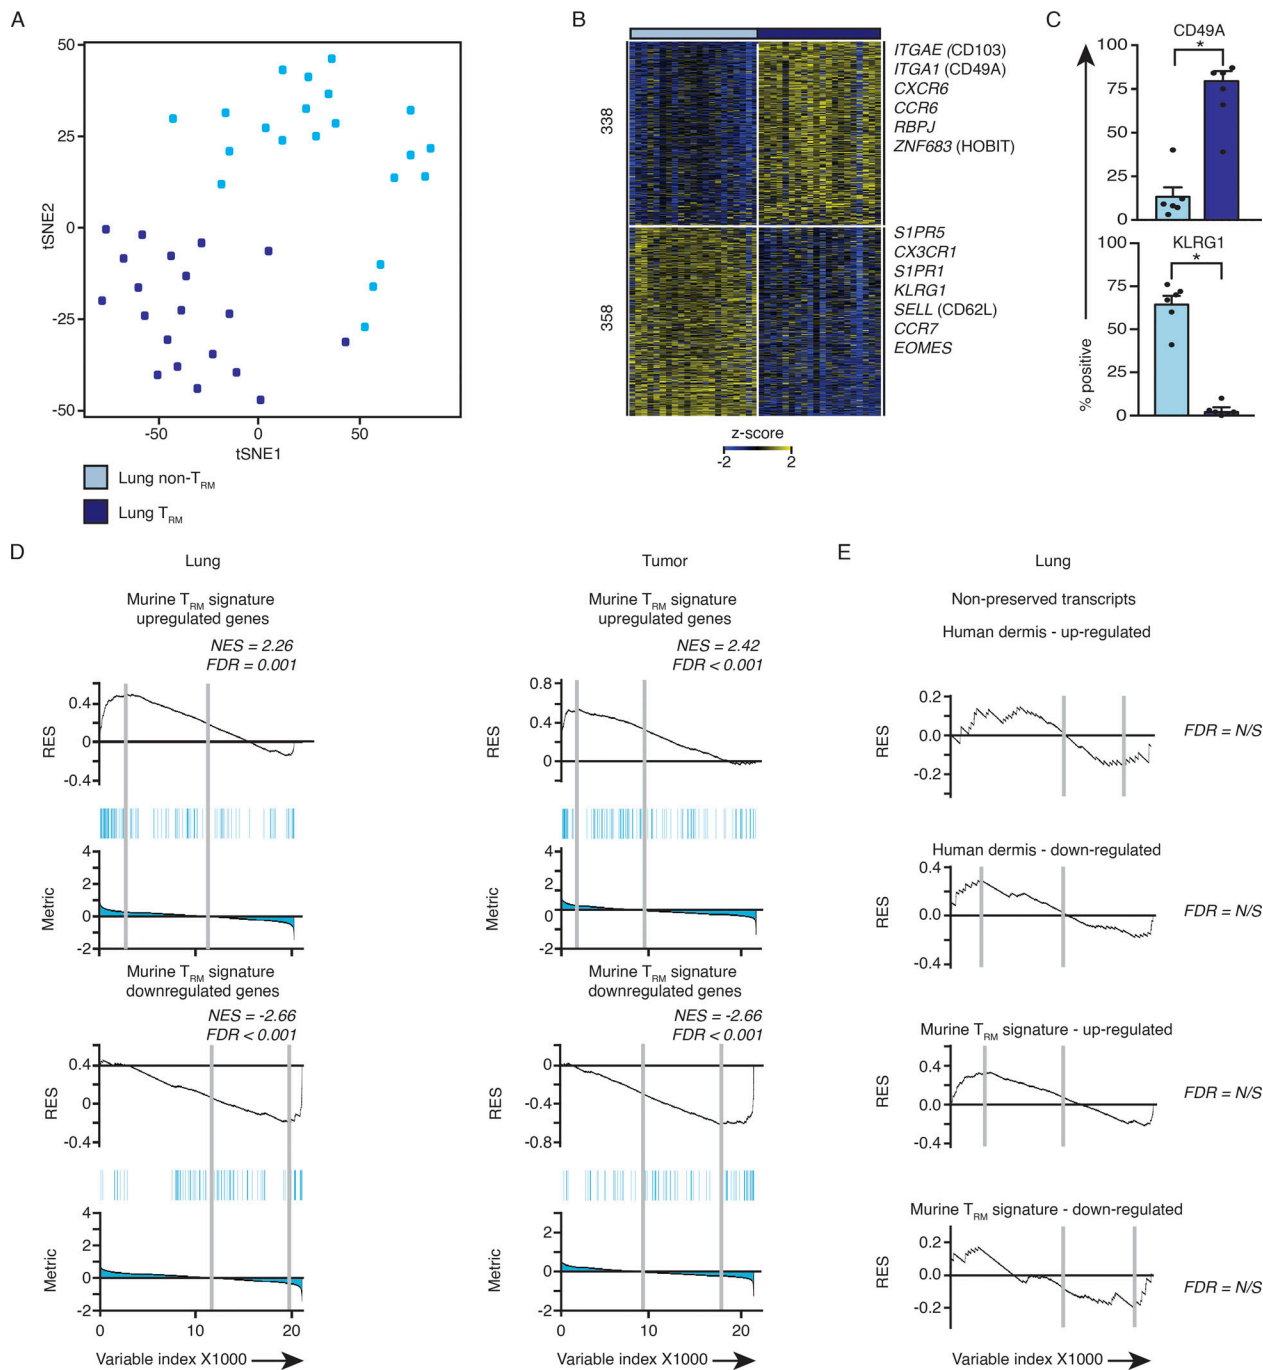

Figure S1. **Validation of  $T_{RM}$  phenotype.** (A) tSNE plot of lung  $T_{RM}$  (CD103<sup>+</sup>) and non- $T_{RM}$  (CD103<sup>-</sup>) CTLs. Each symbol represents an individual patient sample ( $n = 21$  non- $T_{RM}$ ;  $n = 20$   $T_{RM}$ ). (B) RNA-seq analysis of transcripts (one per row) expressed differentially between lung  $T_{RM}$  and lung non- $T_{RM}$  (pairwise comparison; change in expression of twofold with an adjusted P value of  $\leq 0.05$  [DESeq2 analysis; Benjamini-Hochberg test]), presented as row-wise z-scores of TPM counts. Each column represents an individual sample; key known  $T_{RM}$  or non- $T_{RM}$  transcripts are indicated. (C) Flow cytometry analysis of the expression of CD49A and KLRG1 versus that of CD103 among live and singlet-gated CD14<sup>-</sup>CD19<sup>-</sup>CD20<sup>-</sup>CD45<sup>+</sup>CD3<sup>+</sup>CD8<sup>+</sup> cells obtained from lung. Calculated as a frequency of CD103<sup>+</sup>CTLs or CD103<sup>-</sup>CTLs that express the indicated surface marker (\*,  $P \leq 0.05$ ,  $n = 6$ ; Wilcoxon rank-sum test). Bars represent the mean and t-lines the SEM, and symbols represent data from individual samples. (D) GSEA of the murine composite  $T_{RM}$  signature in the transcriptome of  $T_{RM}$  versus non- $T_{RM}$ . Top: RES for the gene set, from most enriched genes at left to most underrepresented at right. Middle: Positions of gene set members (blue vertical lines) in the ranked list of genes. Bottom: Value of the ranking metric. Values above the plot represent the NES and FDR-corrected significance value in CTLs isolated from lung and tumor samples. (E) GSEA of the lung  $T_{RM}$  versus non- $T_{RM}$  cells for nonpreserved transcripts (in Fig. 1, B and C; as per D; N/S, not significant).

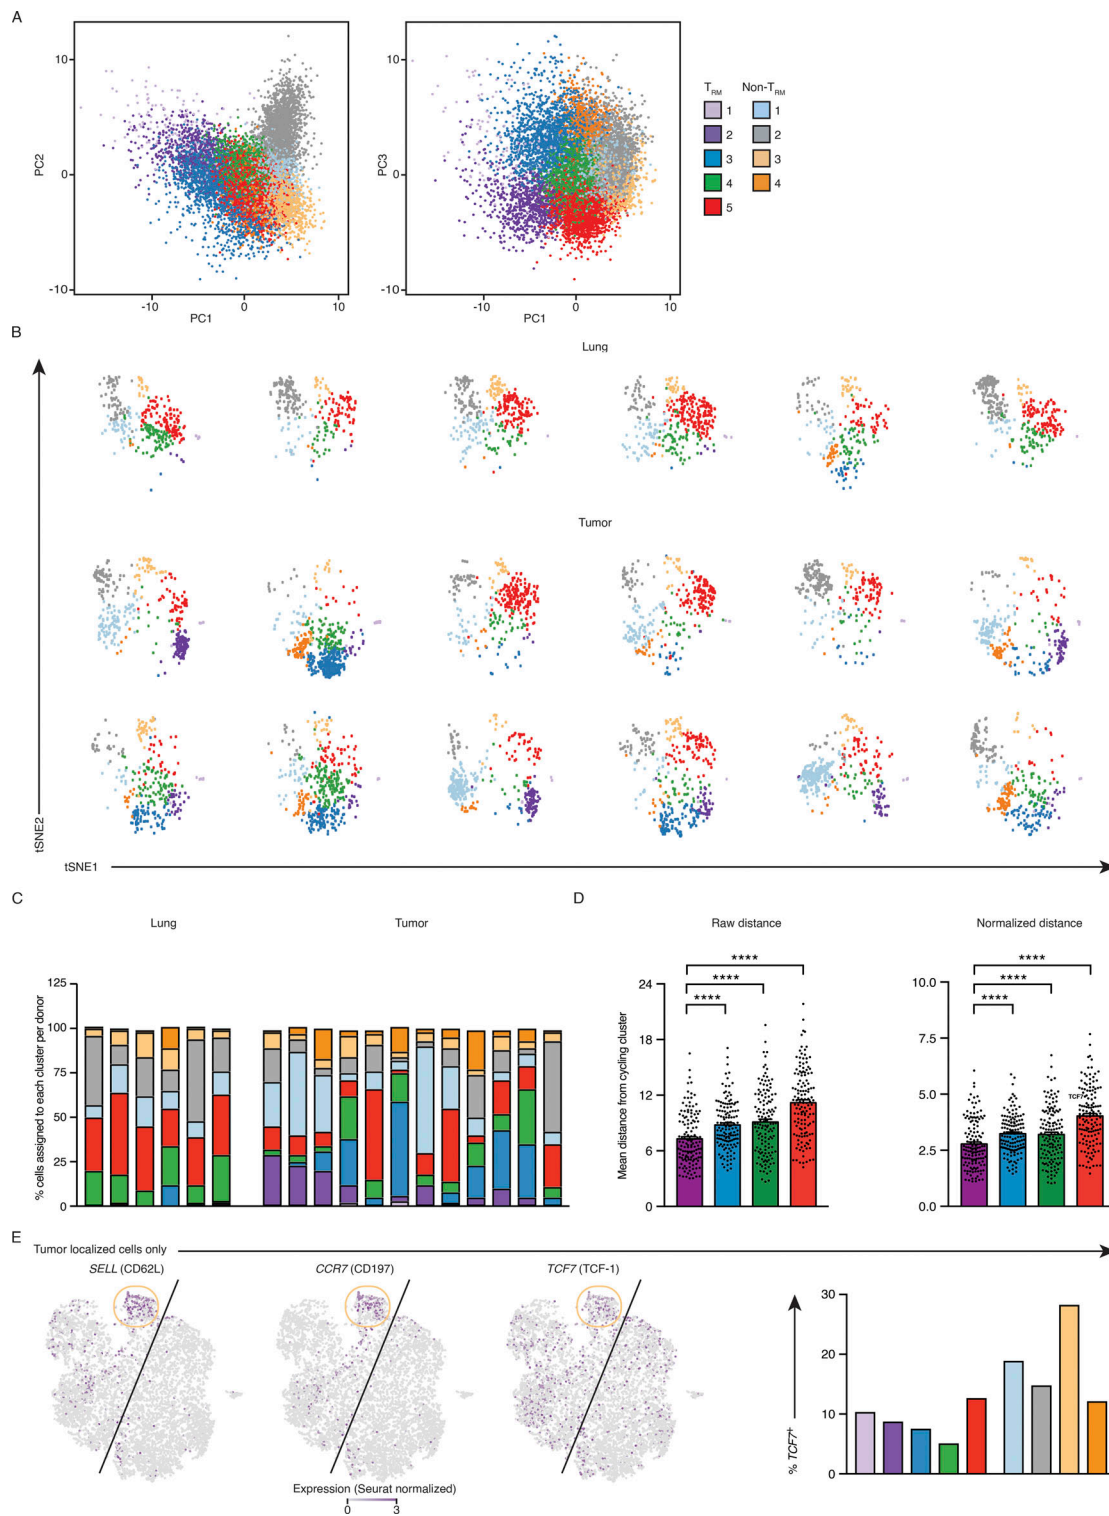

Figure S2. **T<sub>RM</sub> cells cluster into four major subtypes.** (A) PCA of the single-cell transcriptomes, where each point represents a cell that is colored as per the cluster assignment in Fig. 3; numbers along perimeter indicate PCs (PC1–PC3). (B) tSNE visualization of single-cell transcriptomes, shown per donor, obtained from 12 tumors and 6 matched normal lung samples. Each symbol represents a cell; color indicates Seurat clustering of cells, as per Fig. 3 B, identifying nine clusters. (C) Breakdown of cells assigned to each cluster in each donor, separated by tissue type of origin (colored as per Fig. 3 B). (D) The distance in PC space between a cell assigned to cluster 1 compared with the mean of cells assigned into the other clusters (colored as per Fig. 3 B). The difference was calculated with the raw (left) and z-score-normalized (right) distances; bars represent the mean distance to each of the other clusters, t-lines represent SEM, and symbols represent individual cells in cluster 1 (\*\*\*\*,  $P \leq 0.0001$ ;  $n = 135$  cells; Wilcoxon rank-sum test). (E) Left: Seurat-normalized expression of indicated transcripts identified as differentially enriched in the non-T<sub>RM</sub> cluster 3 (colored as per Figs. 3 B and S3 A), overlaid across the tSNE plot, with expression levels represented by the color scale. Right: Percentage of cells expressing *TCF7* transcripts in each T<sub>RM</sub> cluster (as per Fig. 3 B), where positive expression was defined as >1 Seurat-normalized count.

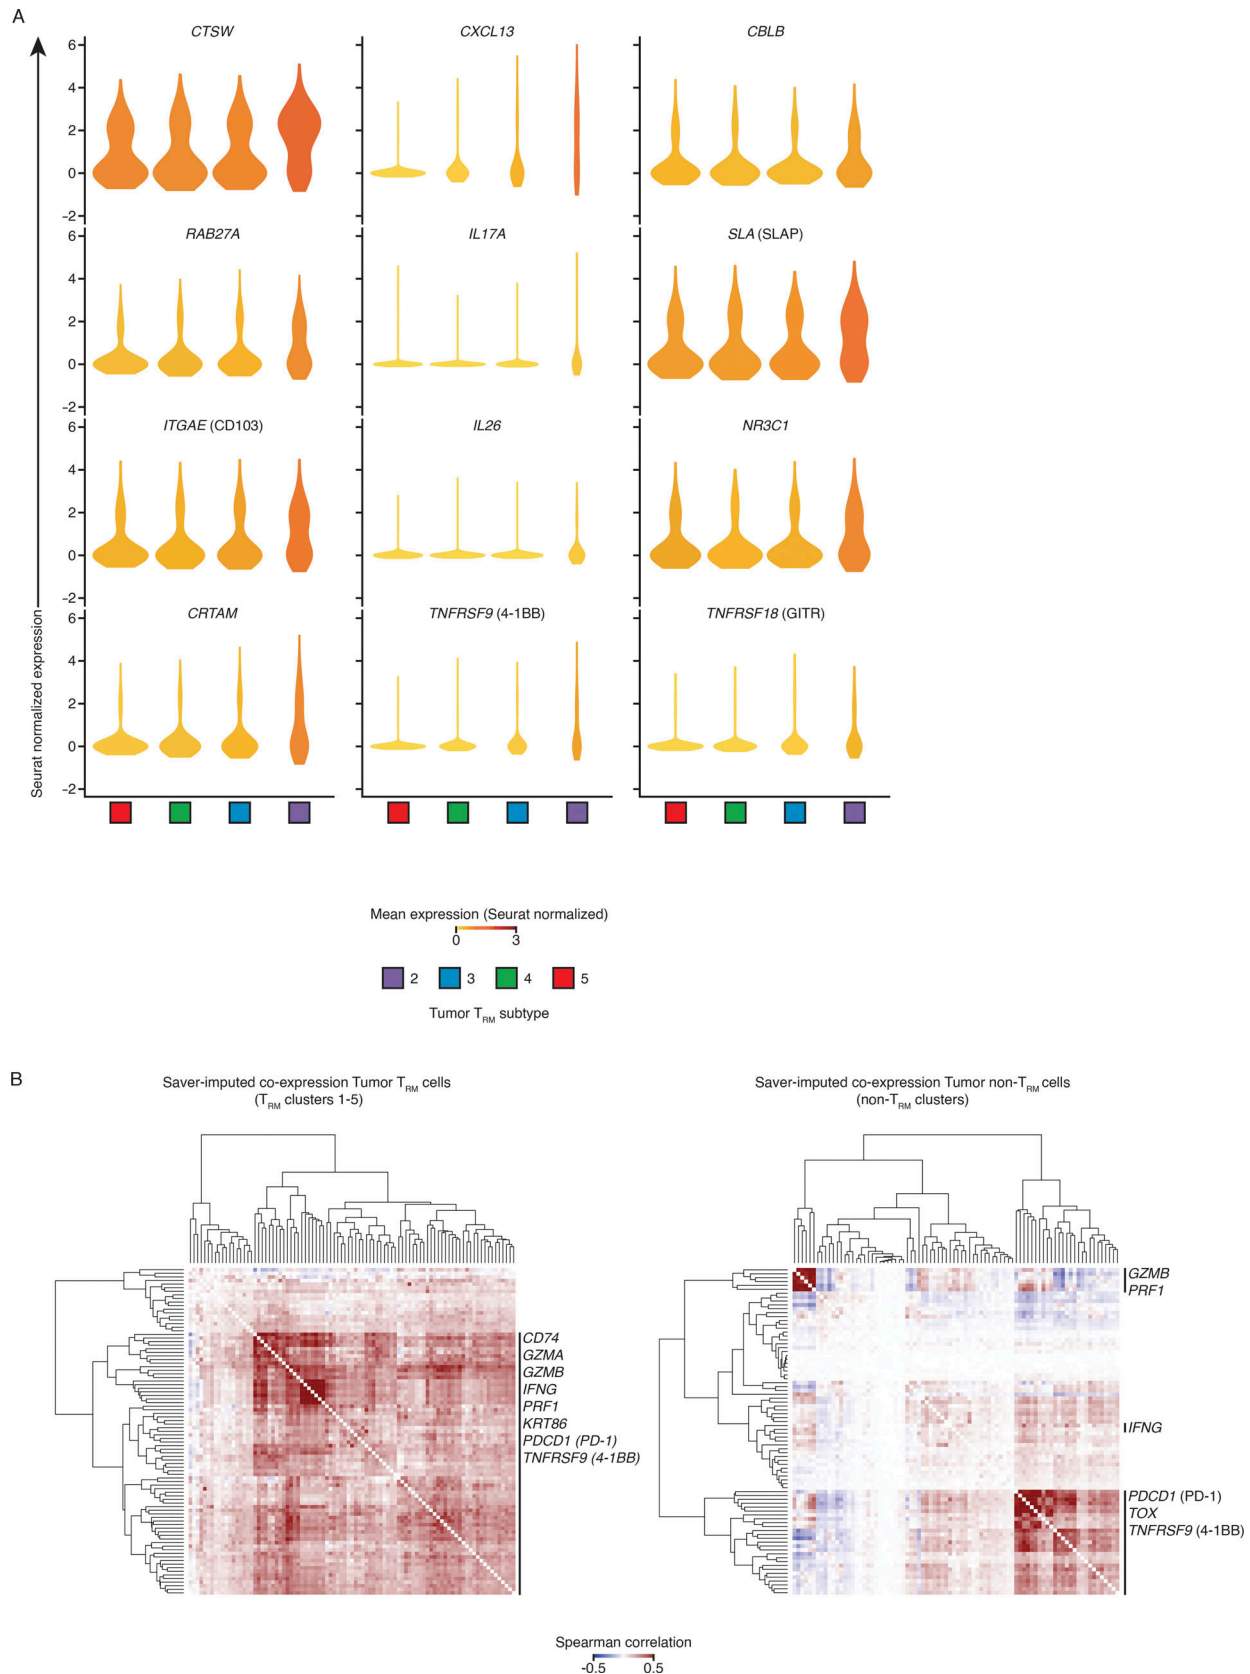

Figure S3. **Tumor  $T_{RM}$  cells are enriched for transcripts associated with enhanced antitumor features.** (A) Violin plot of expression of indicated transcripts; shape represents the distribution of expression among cells, and color represents average expression, calculated from the Seurat-normalized counts. (B) SAVER-imputed spearman coexpression analysis of genes whose expression is enriched in the  $TIM-3^+IL7R^-$   $T_{RM}$  cluster (Fig. 4 A) in tumor  $T_{RM}$  and non- $T_{RM}$  clusters, respectively; the matrix is clustered according to complete linkage.

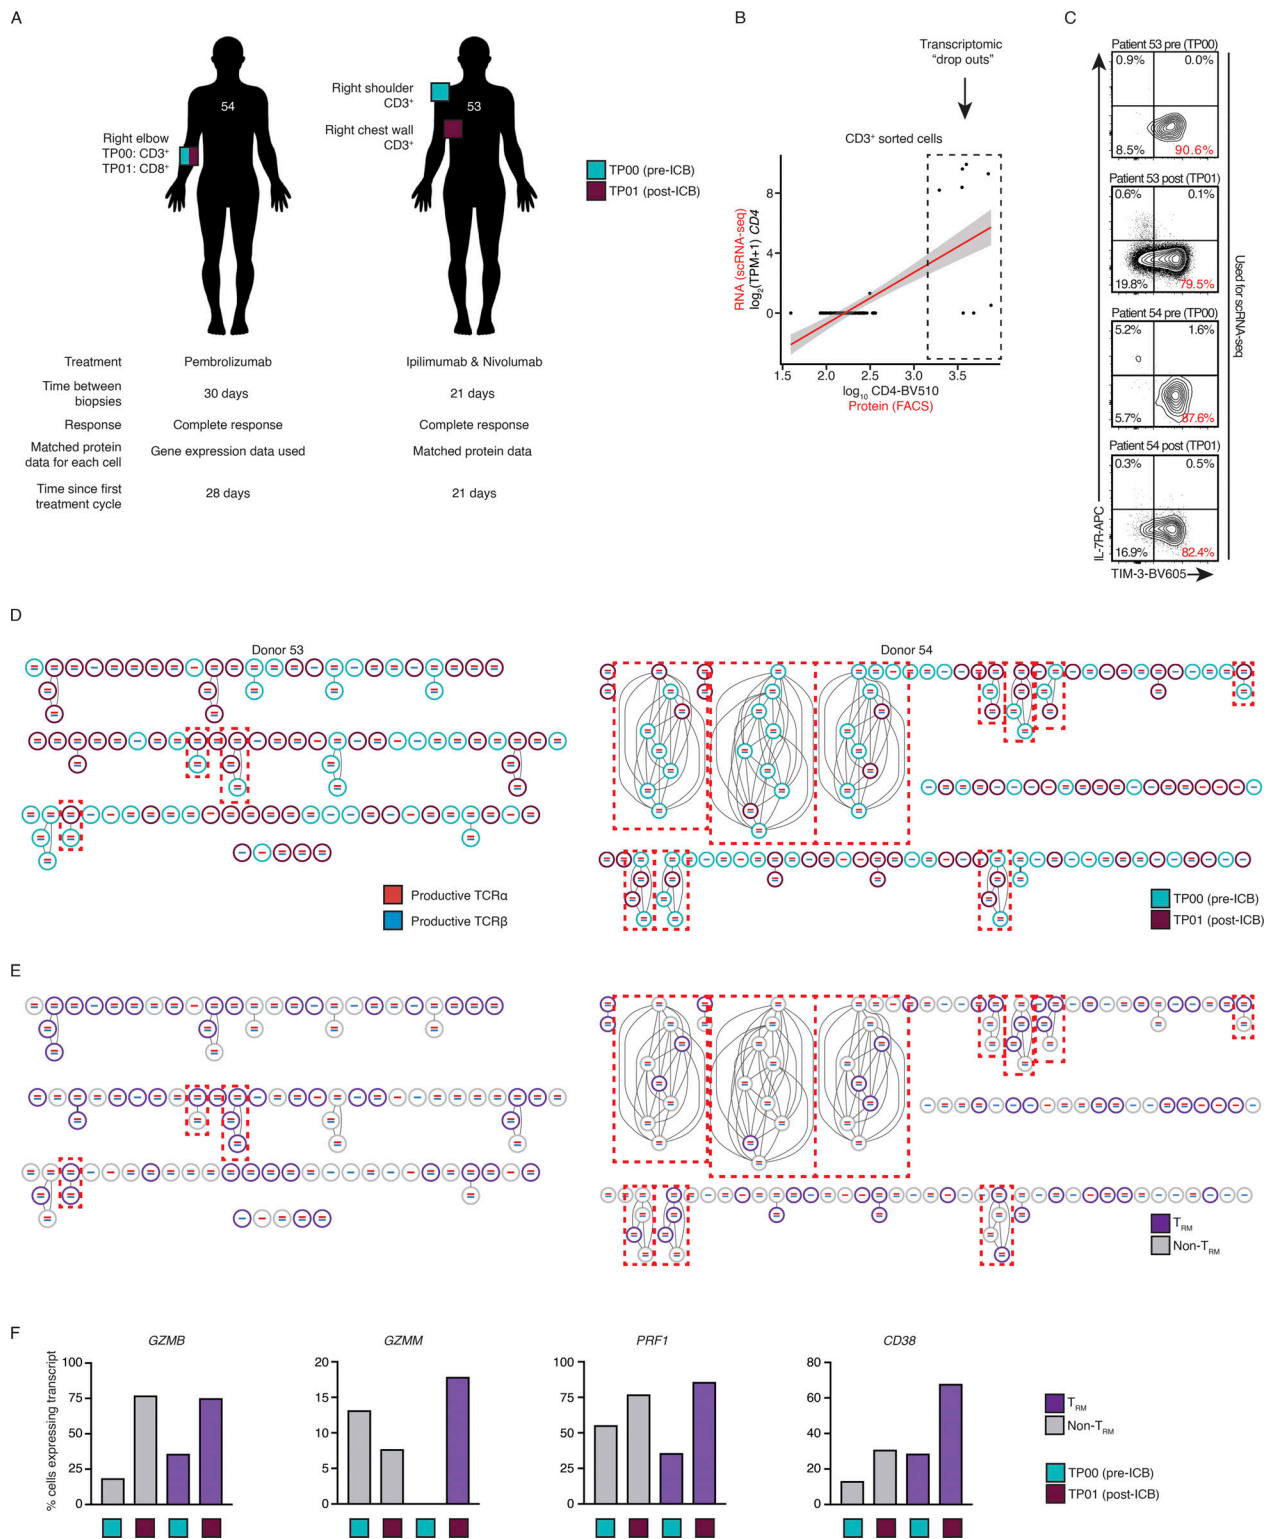

Figure S4. **Single-cell transcriptome analysis of CTLs from anti-PD-1 responders.** (A) Schematic representation of clinical details and cells sorted for the patients selected for study. TP, time point; ICB, immune-checkpoint blockade. (B) Example of in silico removal of CD4<sup>+</sup> cells, highlighting the transcriptomic dropouts (single-cell RNA-seq [scRNA-seq]). The dashed line corresponds to the CD4<sup>+</sup> cells removed. (C) Flow cytometry analysis of the expression of TIM-3 versus that of IL-7R in live, singlet CD14<sup>-</sup>CD19<sup>-</sup>CD20<sup>-</sup>CD4<sup>-</sup>CD45<sup>+</sup>CD3<sup>+</sup>CD8<sup>+</sup>CD103<sup>+</sup> cells obtained from patients responding to anti-PD-1 therapy both before and after therapy ( $n = 2$  donors at two time points, as per A). (D) A clonotype network graph of cells from patient 53 and 54 (A), highlighting the time point from which the cells were isolated. Cells highlighted through a dashed line correspond to shared clonotypes across time points. (E) A clonotype network graph (as per D), highlighting the  $T_{RM}$  cells and non- $T_{RM}$  cells, marked in purple and black, respectively. Cells were assigned based on protein expression of CD103; alternatively, if cell-specific protein expression was not available, cells with >10 TPM counts expression of *ITGAE* (*CD103*), *RBPJ*, or *ZNF683* (*HOBIT*) were considered  $T_{RM}$  cells. (F) Percentage of cells expressing the indicated transcripts in each population, where  $T_{RM}$  cells were identified as per D and E.

Tables S1–S12 are provided online in a .zip file containing separate Excel files. Table S1 lists clinical and histopathological characteristics of patients used in this study. Table S2 contains a list of differentially expressed genes in lung  $T_{RM}$  versus non- $T_{RM}$  cells. Table S3 contains gene lists utilized for GSEA and preservation analysis of  $T_{RM}$  signatures from published datasets. Table S4 contains lists of differentially expressed genes in tumor  $T_{RM}$  versus tumor non- $T_{RM}$  cells. Table S5 lists differentially expressed genes in stimulated versus unstimulated  $T_{RM}$  and non- $T_{RM}$  cells from both lung and tumor from cells isolated from immunotherapy treatment-naïve patients. Table S6 provides TCR-seq library and clonality information from cells isolated from immunotherapy treatment-naïve patients. Table S7 provides a list of genes uniquely expressed in tumor  $T_{RM}$  subsets from cells isolated from immunotherapy treatment-naïve patients, a list of genes uniquely expressed in tumor CTL subsets from cells isolated from immunotherapy treatment-naïve patients, and a list of differentially expressed genes in  $PDCD1^+$   $T_{RM}$  (clusters 2–5) versus  $PDCD1^+$  non- $T_{RM}$  cells (non- $T_{RM}$  clusters 1–4) from cells isolated from immunotherapy treatment-naïve patients. Table S8 lists TCR chain sequences from single-cell RNA-seq assays from cells isolated from immunotherapy treatment-naïve patients. Table S9 lists differentially expressed genes in  $TIM-3^+$   $T_{RM}$  cells versus other  $T_{RM}$  cells from cells isolated from immunotherapy treatment-naïve patients. Table S10 lists single-cell coexpression and correlation analysis of genes enriched in “cluster 2” TRM subset, and correlation analysis of protein expression levels from flow cytometry data from cells isolated from immunotherapy treatment-naïve patients. Table S11 lists quantification of CD8, CD103, and TIM-3 multiplexed immunohistochemistry counts from tumor samples of lung cancer patients with  $TIL^{high} T_{RM}^{high}$  and  $TIL^{low} T_{RM}^{low}$  tumor status. Table S12 describes assignment of single-cell libraries into  $T_{RM}$  and non- $T_{RM}$  cells, TCR chain sequences from single-cell RNA-seq assays, list of differentially expressed genes from cells before and after anti-PD-1, and single-cell correlation analysis after anti-PD-1 in CTLs.
